# Supplementary material
Source: Springer Nature journal article supplement (https://www.springermedizin.de/resource/supplementary/12985_2011_1295_MOESM3_ESM.pdf/9609482)

**(A)**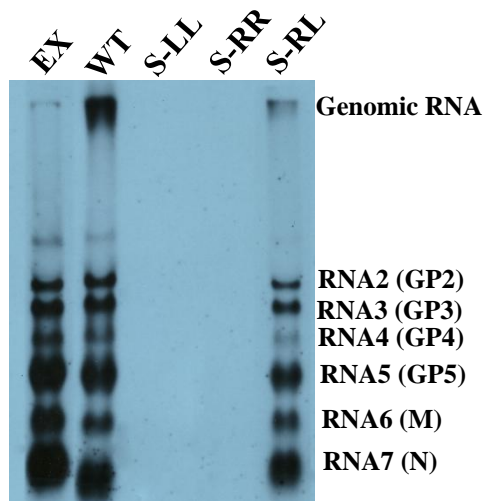**(B)**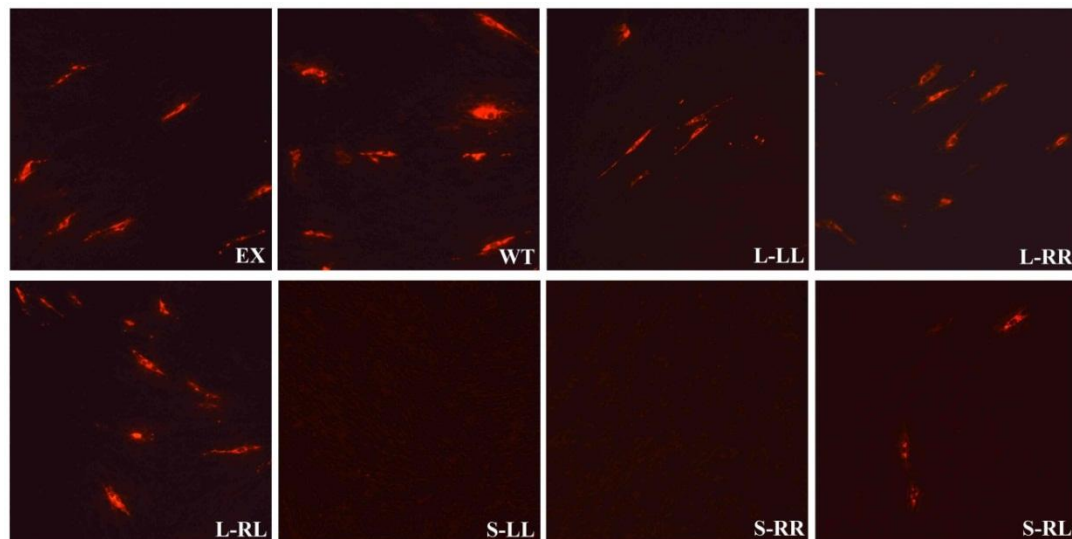**(C)**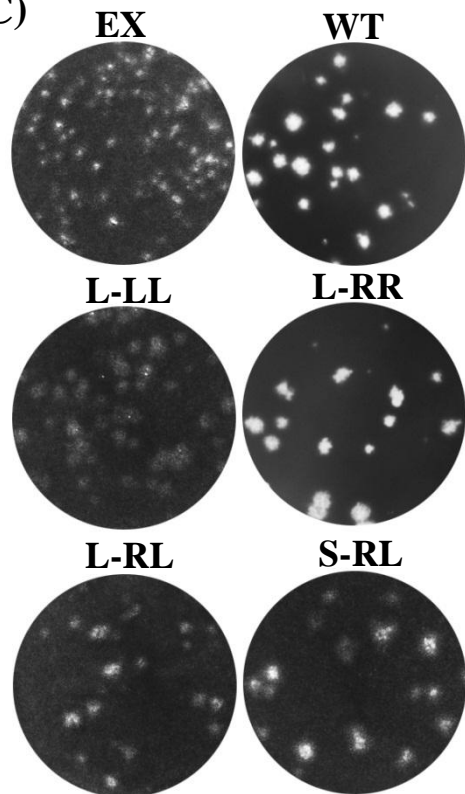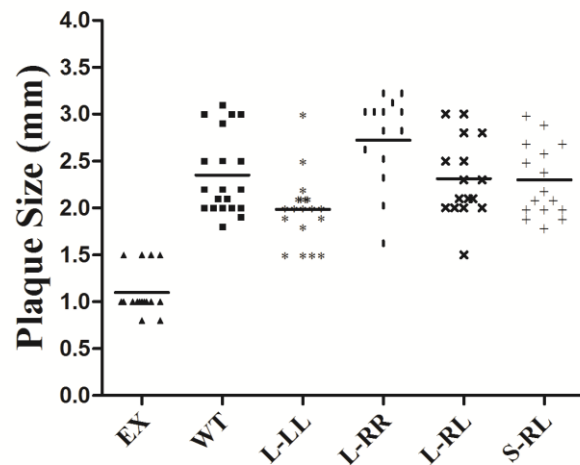**(D)**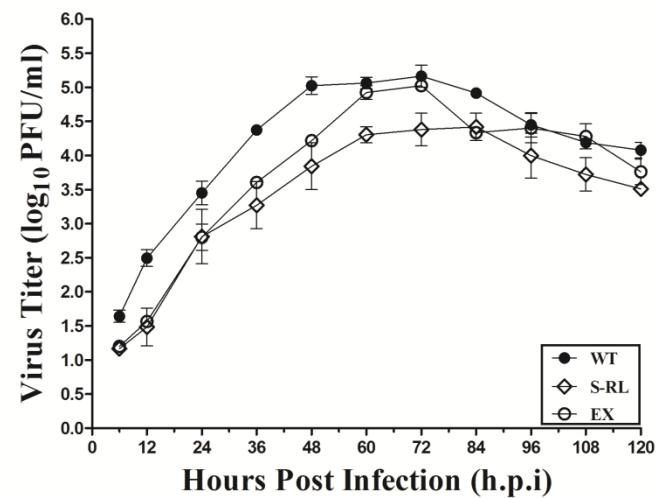

Supplement: MOESM3 [file 9609482]
